# Supplementary material
Source: PubMed Central journal article supplement (PMC3206987)
Supplement: NIHMS325389-supplement-7.pdf [file NIHMS325389-supplement-7.pdf]

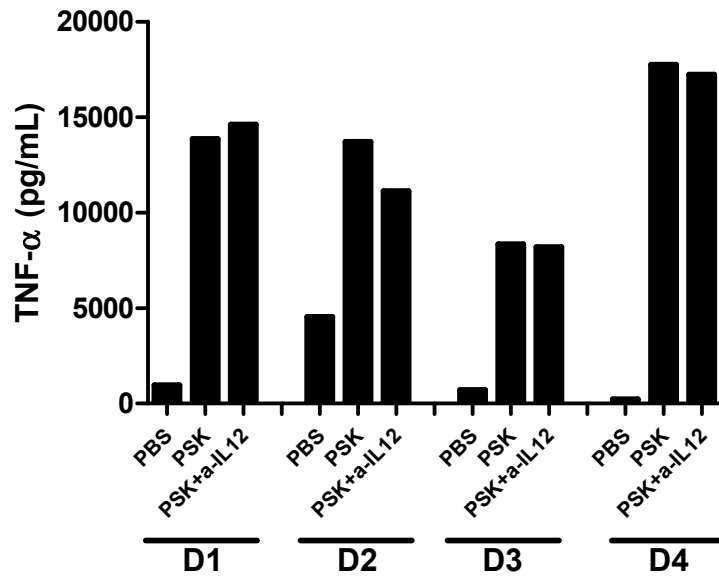

**Supplemental Figure 1.** IL-12 blockade did not decrease TNF- $\alpha$  secretion by PSK-stimulated PBMC. Shown are results from 4 donor PBMC (D1-D4) stimulated with control PBS, PSK (100  $\mu$ g/mL), or PSK+anti-IL12 (10  $\mu$ g/mL). Culture supernatant was collected after 48 hr of incubation and the level of TNF- $\alpha$  were measured by Luminex.
