# Supplementary material
Source: PubMed Central journal article supplement (PMC3206987)
Supplement: NIHMS325389-supplement-8.pdf [file NIHMS325389-supplement-8.pdf]

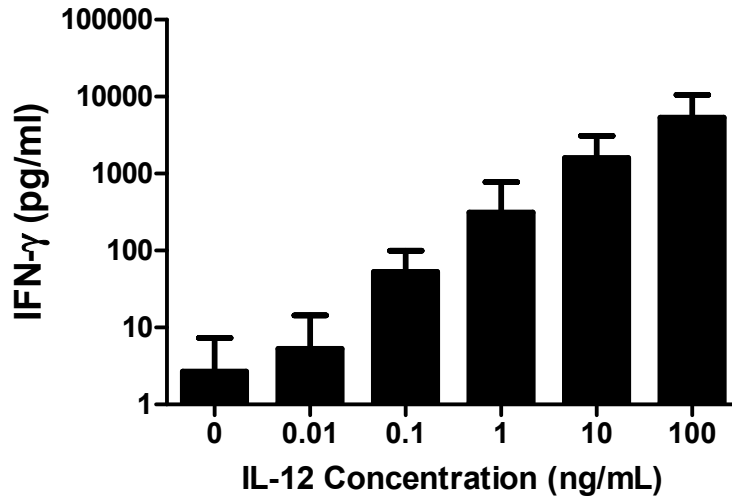

**Supplemental Figure 2.** Dose titration of IL-12-induced IFN- $\gamma$  production by PBMC. PBMC were treated with 1:10 serial dilutions of IL-12 (from 0.01 to 100 ng/ml) in RPMI for 24 hr and the concentration of IFN- $\gamma$  in culture supernatant was determined by ELISA. Shown are results (mean $\pm$ SD) from 3 different donors.
