# Supplementary material
Source: PubMed Central journal article supplement (PMC3206987)
Supplement: NIHMS325389-supplement-9.pdf [file NIHMS325389-supplement-9.pdf]

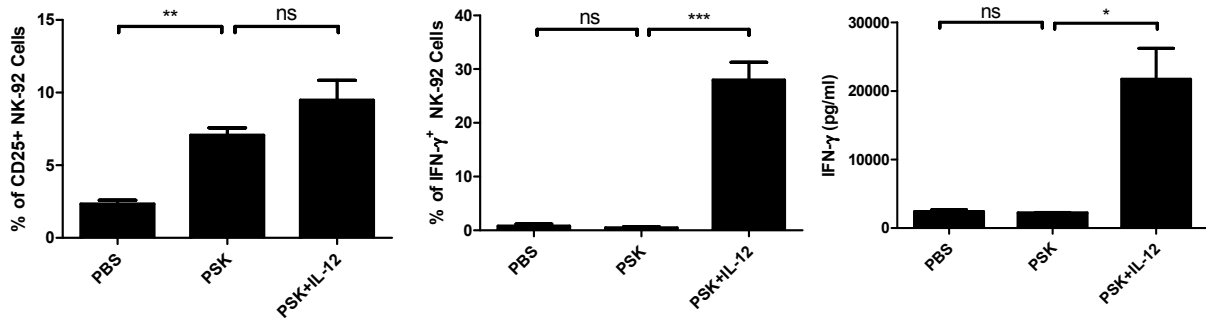

**Supplemental Figure 3.** PSK induces CD25 expression on NK-92 cells, but does not induce IFN- $\gamma$  production by NK-92 cells. NK-92 cells were stimulated with PBS, PSK (100  $\mu\text{g/ml}$ ), or PSK (100  $\mu\text{g/ml}$ )+IL-12 (1  $\text{ng/ml}$ ) for 24 hr. The expression of CD25 and IFN- $\gamma$  was analyzed by FACS. Culture supernatant was collected for IFN- $\gamma$  measurement by ELISA. All results shown are representative of three independent experiments. \*,  $p < 0.05$ ; \*\*,  $p < 0.01$ ; \*\*\*,  $p < 0.001$  by Student t test.
