# Supplementary material
Source: PubMed Central journal article supplement (PMC3206987)
Supplement: NIHMS325389-supplement-10.pdf [file NIHMS325389-supplement-10.pdf]

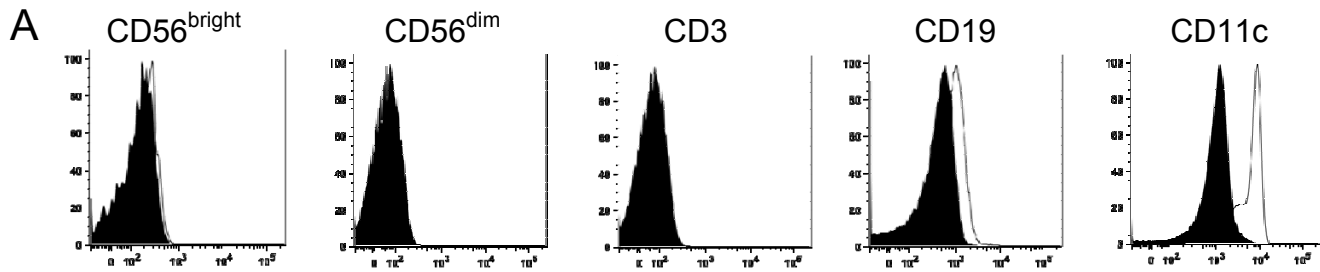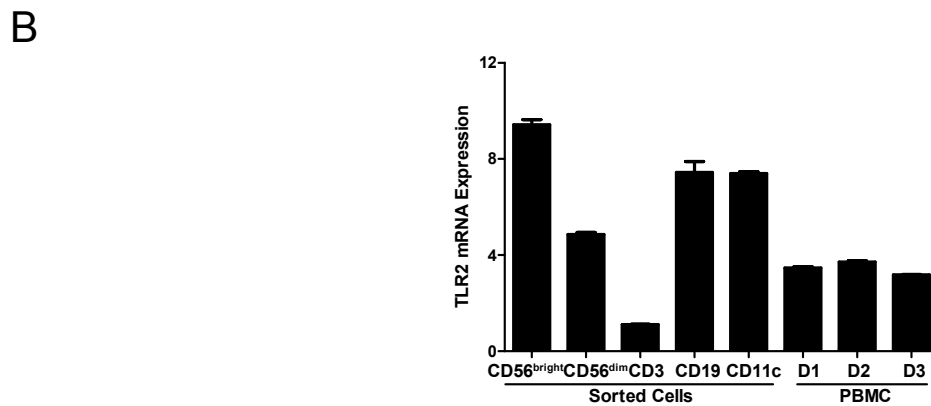

**Supplemental Figure 4.** TLR2 expression on NK cells is very low but detectable. (A) Overlay histograms showing expression of TLR2 on CD56<sup>bright</sup> and CD56<sup>dim</sup> NK cells, CD3<sup>+</sup> T cells, CD19<sup>+</sup> B cells, and CD11c<sup>+</sup> DC. Filled histogram: isotype control; unfilled histogram: TLR2-PE. Similar results were obtained using PBMC from 2 different donors. (B) Real time RT-PCR analysis using RNA extracted from FACS-sorted cells (CD56<sup>bright</sup> and CD56<sup>dim</sup> NK cells, CD3<sup>+</sup> T cells, CD19<sup>+</sup> B cells, and CD11c<sup>+</sup> DCs) or total PBMC (D1, D2 and D3 indicate three different donors). Shown are the expression levels of TLR2 mRNA normalized to HPRT. Two independent experiments yielded similar results.
