# Supplementary material
Source: PubMed Central journal article supplement (PMC3206987)
Supplement: NIHMS325389-supplement-11.pdf [file NIHMS325389-supplement-11.pdf]

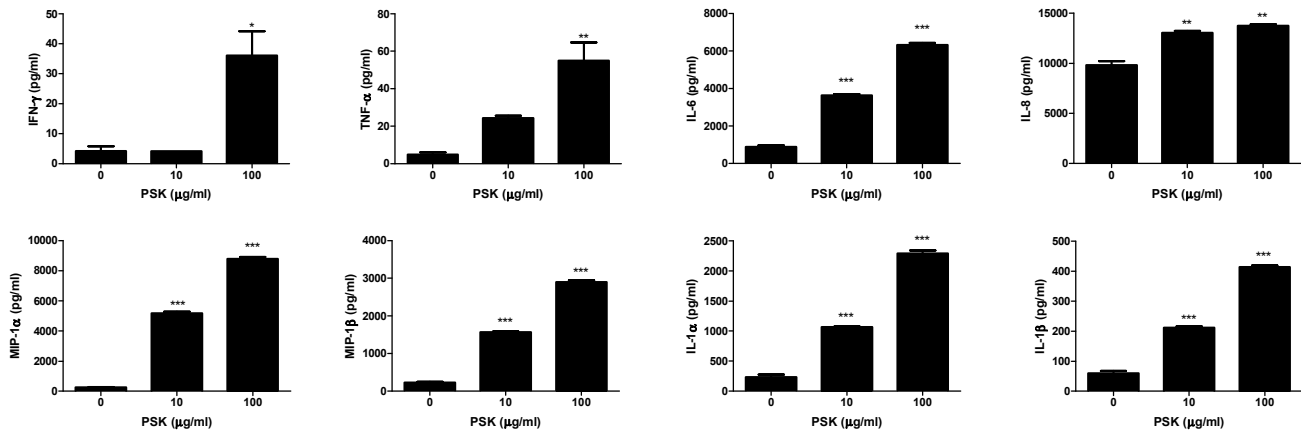

**Supplemental Figure 5.** Multiple proinflammatory cytokines and chemokines were induced in K562 lysis assay when the PBMC were prestimulated with PSK. PBMC were pretreated with PSK (10 and 100  $\mu\text{g/ml}$ ) or PBS for 48 hr prior to the 4 hr co-incubation with the target K562 cells. Culture supernatant from the 4 hr incubation was collected and the cytokine/chemokine levels were analyzed by Luminex. Shown are mean $\pm$ SD of cytokine levels in duplicate culture wells. \*,  $p < 0.05$ ; \*\*,  $p < 0.01$ ; \*\*\*,  $p < 0.001$  between PSK (10 or 100  $\mu\text{g/ml}$ ) and PBS group using ANOVA analysis with Tukey's post test. Similar results were obtained from 4 independent experiments using PBMC from different donors.
