# Supplementary material
Source: PubMed Central journal article supplement (PMC3206987)
Supplement: NIHMS325389-supplement-12.pdf [file NIHMS325389-supplement-12.pdf]

**Supplemental Table.** PSK significantly increased the trastuzumab-dependent lysis of breast cancer cells by human PBMC.

| Donor        | E:T Ratio | Percent Specific Lysis |                 |             |                 |
|--------------|-----------|------------------------|-----------------|-------------|-----------------|
|              |           | SKBR3                  |                 | MDA-MB-231  |                 |
|              |           | Trastuzumab            | Trastuzumab+PSK | Trastuzumab | Trastuzumab+PSK |
| 1            | 100:1     | 71.4%                  | 95.6%           | 10.4%       | 12.8%           |
|              | 50:1      | 47.0%                  | 65.8%           | 6.2%        | 6.1%            |
|              | 25:1      | 33.9%                  | 42.1%           | 4.4%        | 4.5%            |
|              | 12.5:1    | 14.8%                  | 38.7%           | 2.7%        | 2.8%            |
| 2            | 100:1     | 72.9%                  | 88.7%           | 11.7%       | 13.1%           |
|              | 50:1      | 48.4%                  | 77.2%           | 4.7%        | 10.3%           |
|              | 25:1      | 31.6%                  | 52.5%           | 2.7%        | 7.9%            |
|              | 12.5:1    | 19.9%                  | 42.6%           | -1.2%       | 2.8%            |
| 3            | 100:1     | 75.1%                  | 101.7%          | 40.0%       | 58.9%           |
|              | 50:1      | 67.7%                  | 83.0%           | 25.0%       | 39.3%           |
|              | 25:1      | 52.8%                  | 58.7%           | 18.4%       | 26.8%           |
|              | 12.5:1    | 31.1%                  | 49.6%           | 5.3%        | 16.8%           |
| 4            | 100:1     | 67.3%                  | 86.0%           | 14.6%       | 30.9%           |
|              | 50:1      | 50.0%                  | 65.0%           | 7.3%        | 21.5%           |
|              | 25:1      | 30.3%                  | 51.7%           | 6.5%        | 11.1%           |
|              | 12.5:1    | 16.0%                  | 36.7%           | 5.1%        | 2.6%            |
| 5            | 100:1     | 7.2%                   | 19.7%           | 4.6%        | 10.0%           |
|              | 50:1      | 0.1%                   | 12.9%           | 3.6%        | 6.2%            |
|              | 25:1      | 0.1%                   | 10.2%           | 1.1%        | 1.8%            |
|              | 12.5:1    | 1.2%                   | 2.4%            | 0.6%        | -1.9%           |
| Mean<br>±sem | 100:1     | 58.8±12.9%             | 78.3±14.9%***   | 16.3±6.3%   | 25.1±9.2%*      |
|              | 50:1      | 42.6±11.3%             | 60.8±12.5%**    | 9.4±3.9%    | 16.7±6.3%*      |
|              | 25:1      | 29.7±8.5%              | 43.0±8.6%**     | 6.6±3.1%    | 10.4±4.4%*      |
|              | 12.5:1    | 16.6±4.8%              | 34.0±8.2%*      | 2.5±1.3%    | 4.6±3.2%        |

\*,  $p < 0.05$ , \*\*,  $p < 0.01$ , \*\*\*,  $p < 0.001$  between PBMC pretreated with PSK or no PSK by paired Student's *t* test.
